# Supplementary material
Source: HighWire-hosted journal article supplement (https://www.jneurosci.org/highwire/filestream/601412/field_highwire_adjunct_files/0/Supplemental_Figures.pdf)
Supplement: Supplemental_Figures.pdf [file Supplemental_Figures.pdf]

### M605 - sections from z series gallery

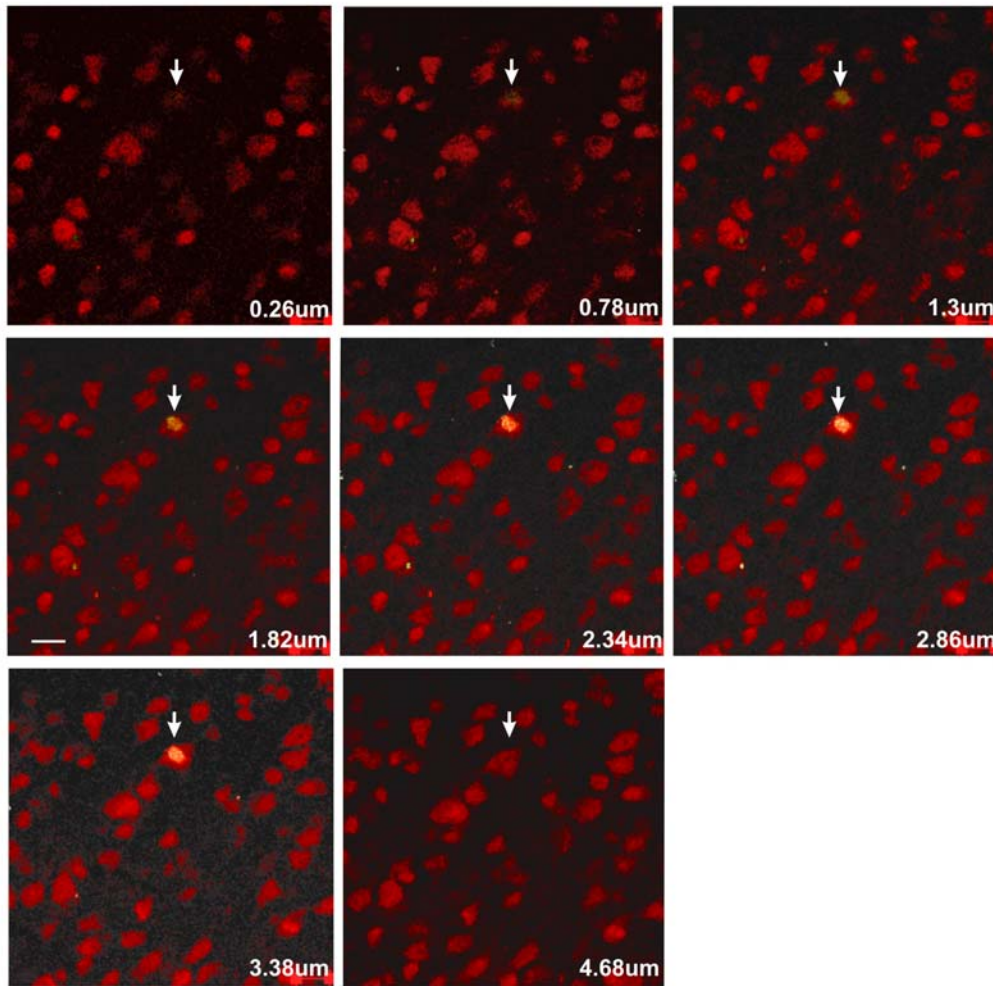

### Supplementary Figure 1

**Supplementary Figure 1.** Confocal images from the z plane gallery for the cell shown in Figure 4a. The section interval distances (given in microns) are indicated and based on the Z stack through the BrdU/NeuN colabeled cell. The sequence spanned 6.6µm which was uncorrected for optical shrinkage in the z plane. Note that the BrdU labeled nucleus is contained inside the pyramidal neuron's cell body. The nucleus in this cell spans ~ 3µm in the optical Z plane (which translates to a ~6 µm diameter once z shrinkage is factored in). For this ~20µm+ diameter neuron, ~6 µm is about the diameter one would expect of the nucleus.

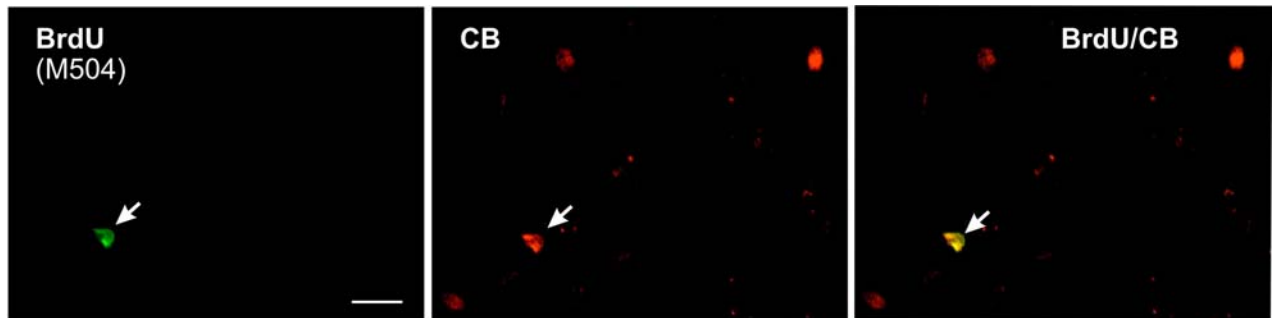

Supplementary Figure 2

**Supplementary Figure 2.** Low power confocal image of the BrdU/CB colabeled cell shown in Figure 2d.

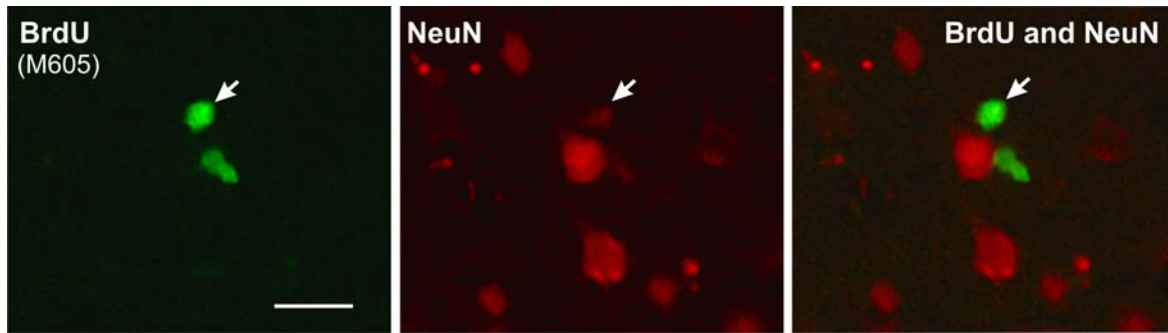

Supplementary Figure 3

**Supplementary Figure 3.** An example of overlapping or juxtaposed BrdU and NeuN labeled cells (arrows) and nearby NeuN and BrdU labeled cells.

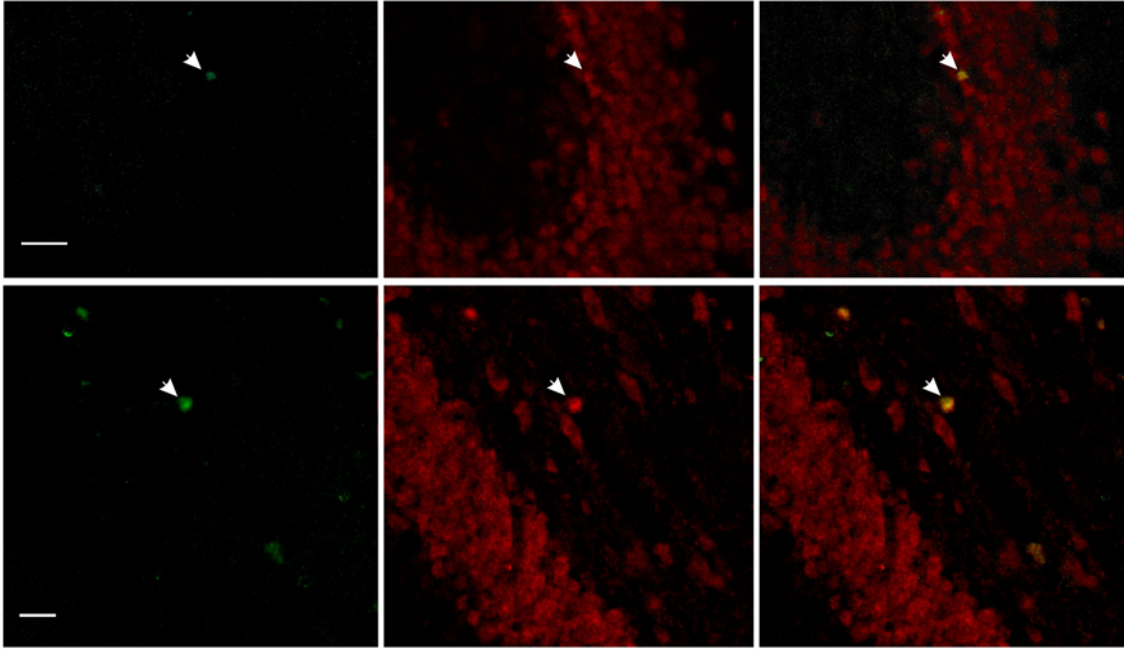

#### Supplementary Figure 4

**Supplementary Figure 4.** Two examples of BrdU and NeuN colabeled cells (arrows) in the dentate gyrus in the control monkey M606. Scale bar = 20 $\mu$ m.
